# Supplementary material
Source: Springer Nature journal article supplement (https://www.springermedizin.de/resource/supplementary/12933_2008_145_MOESM3_ESM.pdf/9539696)

# Total population

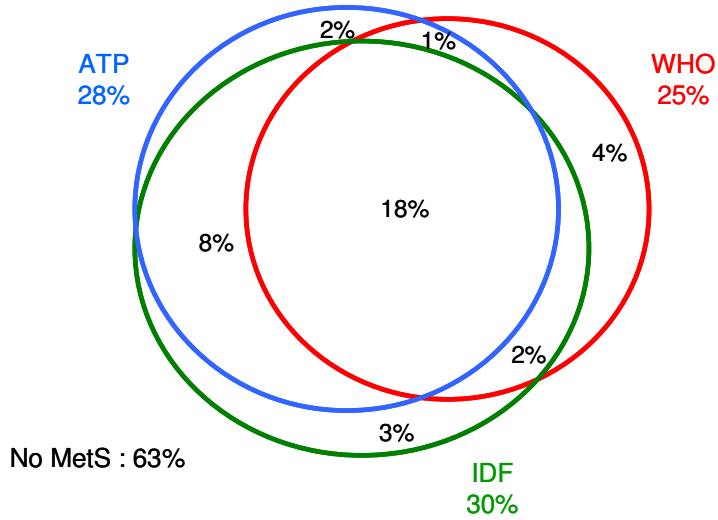

# Men

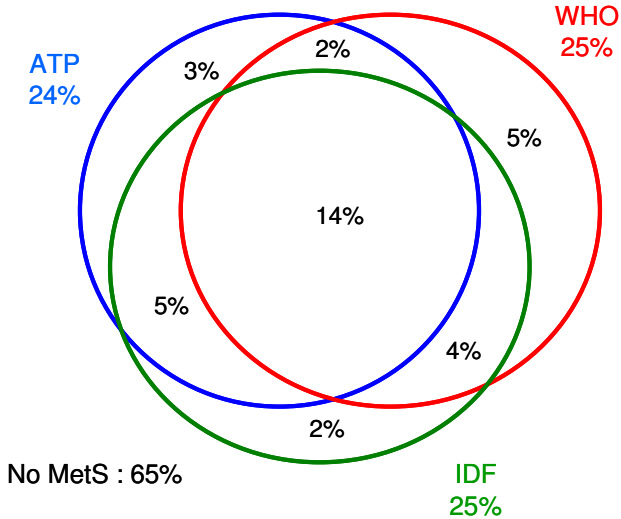

# Women

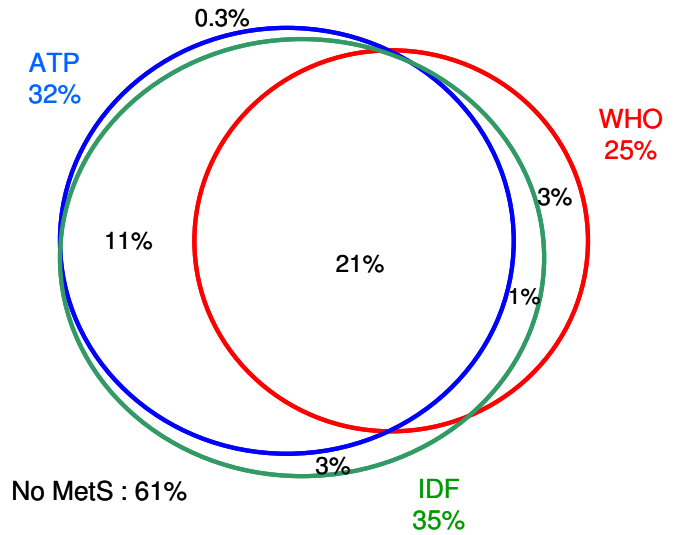

Supplement: MOESM3 [file 9539696]
